# Supplementary material
Source: PubMed Central journal article supplement (PMC5710337)

## Supplementary Online Content

Roduit C, Frei R, Depner M, et al. Phenotypes of atopic dermatitis depending on the timing of onset and progression in childhood. *JAMA Pediatr*. Published online May 22, 2017. doi:10.1001/jamapediatrics.2017.0556.

**eTable 1.** Characteristics of Study Population With Complete Data (Information on Atopic Dermatitis Symptoms at All 7 Time Points Up to 6 Years)

**eTable 2.** Point Prevalence of Atopic Dermatitis Symptoms Up to 6 Years

**eTable 3.** Association Between a Positive SCORAD at 1 and 6 Years of Age and Atopic Dermatitis Phenotypes

**eTable 4.** Association Between Exposures and Atopic Dermatitis Phenotypes (Unadjusted)

**eTable 5.** Association Between Prenatal Exposures and Atopic Dermatitis Phenotypes, Stratified by Allergic Status of the Parents

**eTable 6.** Association Between Atopic Dermatitis Phenotypes and Sensitization to Food and Inhalant Allergens at 1 Year of Age (Cutoff: 0.7 IU/mL)

**eFigure 1.** Probability of Atopic Dermatitis Symptoms at Each Time Point From Birth to 6 Years of Age for Each Atopic Dermatitis Phenotype in the 4-Class Model. With No Missing Data.

**eFigure 2.** SCORAD Scores at 1 and 6 Years of Age and Atopic Dermatitis Phenotypes (Only With Children With SCORAD Score >0)

**eFigure 3.** The Prevalences of Atopic Dermatitis Phenotypes Stratified By the Parental Allergic Status.

This supplementary material has been provided by the authors to give readers additional information about their work.

**eTable 1. Characteristics of study population with complete data (information on atopic dermatitis symptoms at all 7 time points up to 6 years)**

|                                     | Study population with complete data, n=636 |      |
|-------------------------------------|--------------------------------------------|------|
|                                     | No.                                        | %    |
| <b>Center</b>                       |                                            |      |
| Austria                             | 134                                        | 21.1 |
| Switzerland                         | 140                                        | 22.0 |
| France                              | 110                                        | 17.3 |
| Germany                             | 155                                        | 24.4 |
| Finland                             | 97                                         | 15.2 |
|                                     |                                            |      |
| Farmer                              | 309                                        | 48.6 |
|                                     |                                            |      |
| <b>Sex</b>                          |                                            |      |
| Girl                                | 303                                        | 47.6 |
|                                     |                                            |      |
| <b>Parents with allergy history</b> |                                            |      |
| 0                                   | 308                                        | 48.6 |
| 1                                   | 264                                        | 41.6 |
| 2                                   | 62                                         | 9.8  |
|                                     |                                            |      |
| <b>Breastfeeding</b>                |                                            |      |
| 0 months                            | 61                                         | 9.6  |
| >0-2 months                         | 103                                        | 16.2 |
| 3-6 months                          | 172                                        | 27.0 |
| ≥ 7 months                          | 300                                        | 47.2 |

**eTable 2. Point prevalence of atopic dermatitis symptoms up to 6 years**

| Atopic dermatitis symptoms |         |      |
|----------------------------|---------|------|
|                            | No.     | %    |
| 0-1 y                      | 149/974 | 15.3 |
| 1-1.5 y                    | 109/953 | 11.4 |
| 1.5-2 y                    | 119/952 | 12.5 |
| 2-3 y                      | 147/928 | 15.8 |
| 3-4 y                      | 161/954 | 16.9 |
| 4-5 y                      | 144/922 | 15.6 |
| 5-6 y                      | 136/885 | 15.4 |

**eTable 3. Association between a positive SCORAD at 1 and 6 years of age and atopic dermatitis phenotypes**

|                               |        | Early-transient |             | Early-persistent |             | Late |             |
|-------------------------------|--------|-----------------|-------------|------------------|-------------|------|-------------|
|                               | n      | OR              | 95%CI       | OR               | 95%CI       | OR   | 95%CI       |
| <b>Pos. SCORAD&gt;0 at 1y</b> | 50/630 | 8.53            | 4.88- 14.89 | 17.13            | 9.38- 31.31 | 1.96 | 0.67- 5.76  |
| <b>Pos. SCORAD&gt;0 at 6y</b> | 97/975 | 2.13            | 0.77- 5.86  | 22.14            | 9.81- 49.96 | 6.20 | 2.42- 15.88 |

**eTable 4. Association between exposures and atopic dermatitis phenotypes (unadjusted)**

|                                             | Early-transient (n=96) |             |  | Early-persistent (n=67) |              |  | Late (n=50) |             |  |
|---------------------------------------------|------------------------|-------------|--|-------------------------|--------------|--|-------------|-------------|--|
|                                             | OR                     | 95%CI       |  | OR                      | 95%CI        |  | OR          | 95%CI       |  |
| <b>Girls vs boys</b>                        | 1.28                   | (0.84-1.96) |  | 1.79                    | (1.07-2.97)  |  | 1.44        | (0.81-2.56) |  |
| <b>Allergic parent:</b>                     |                        |             |  |                         |              |  |             |             |  |
| <b>2</b>                                    | 2.53                   | (1.36-4.74) |  | 5.82                    | (2.92-11.61) |  | 2.45        | (1.03-5.84) |  |
| <b>1</b>                                    | 1.37                   | (0.86-2.19) |  | 2.02                    | (1.11-3.68)  |  | 1.61        | (0.86-3.03) |  |
| <b>0, ref.</b>                              | 1.00                   | -           |  | 1.00                    | -            |  | 1.00        | -           |  |
| <b>Farmer</b>                               | 0.82                   | (0.54-1.26) |  | 1.44                    | (0.87-2.38)  |  | 0.94        | (0.53-1.66) |  |
| <b>Prenatal exposures</b>                   |                        |             |  |                         |              |  |             |             |  |
| <b>Farm milk during pregnancy</b>           | 0.71                   | (0.46-1.10) |  | 1.17                    | (0.71-1.92)  |  | 0.98        | (0.55-1.75) |  |
| <b>Unboiled farm milk during pregnancy</b>  | 0.65                   | (0.40-1.05) |  | 1.29                    | (0.77-2.14)  |  | 0.90        | (0.49-1.66) |  |
| <b>Work/stay in stable during pregnancy</b> | 0.91                   | (0.58-1.41) |  | 1.11                    | (0.67-1.83)  |  | 0.83        | (0.47-1.48) |  |
| <b>Work/stay in barn during pregnancy</b>   | 1.03                   | (0.66-1.62) |  | 1.15                    | (0.69-1.91)  |  | 1.17        | (0.65-2.10) |  |
| <b>Animal species, during pregnancy:</b>    |                        |             |  |                         |              |  |             |             |  |
| <b>3-4 species</b>                          | 0.53                   | (0.24-1.16) |  | 0.56                    | (0.21-1.49)  |  | 0.13        | (0.02-0.99) |  |
| <b>1-2 species</b>                          | 0.75                   | (0.47-1.17) |  | 1.05                    | (0.61-1.78)  |  | 0.85        | (0.47-1.56) |  |
| <b>0 species, ref.</b>                      | 1.00                   | -           |  | 1.00                    | -            |  | 1.00        | -           |  |
| <b>4 animal species, continuous</b>         | 0.81                   | (0.61-1.01) |  | 0.90                    | (0.71-1.14)  |  | 0.85        | (0.63-1.13) |  |
| <b>Contact with pets (dogs/cats):</b>       | 0.76                   | (0.50-1.16) |  | 0.76                    | (0.46-1.26)  |  | 0.89        | (0.50-1.58) |  |

|                                                  |          |            |       |  |          |            |       |          |            |           |
|--------------------------------------------------|----------|------------|-------|--|----------|------------|-------|----------|------------|-----------|
| <b>With cats</b>                                 | 1.0<br>8 | (0.7<br>1- | 1.65) |  | 0.8<br>2 | (0.5<br>0- | 1.37) | 0.8<br>8 | (0.5<br>0- | 1.5<br>8) |
| <b>With dogs</b>                                 | 0.6<br>9 | (0.4<br>3- | 1.13) |  | 1.0<br>2 | (0.6<br>0- | 1.73) | 1.3<br>2 | (0.7<br>3- | 2.3<br>8) |
| <b>Postnatal exposures</b>                       |          |            |       |  |          |            |       |          |            |           |
| <b>Breastfeeding:</b>                            |          |            |       |  |          |            |       |          |            |           |
| <b>0 months</b>                                  | 0.9<br>3 | (0.4<br>2- | 2.07) |  | 0.2<br>2 | (0.0<br>5- | 0.93) | 0.1<br>8 | (0.0<br>2- | 1.3<br>4) |
| <b>&gt;0-2 months</b>                            | 1.2<br>0 | (0.6<br>2- | 2.22) |  | 0.5<br>7 | (0.2<br>6- | 1.25) | 0.8<br>1 | (0.3<br>4- | 1.9<br>2) |
| <b>3-6 months</b>                                | 1.5<br>5 | (0.9<br>4- | 2.55) |  | 0.7<br>1 | (0.3<br>9- | 1.31) | 1.3<br>1 | (0.6<br>9- | 2.4<br>6) |
| <b>≥ 7 months</b>                                | 1.0<br>0 | -          |       |  | 1.0<br>0 | -          |       | 1.0<br>0 | -          |           |
| <b>Yogurt introduced in the 1<sup>st</sup> y</b> | 0.9<br>2 | (0.5<br>4- | 1.58) |  | 0.5<br>3 | (0.3<br>1- | 0.92) | 0.9<br>7 | (0.4<br>8- | 1.9<br>9) |

**eTable 5. Association between prenatal exposures and atopic dermatitis phenotypes, stratified by allergic status of the parents**

| No allergic parents                                 | Early-transient |          |     |      |          |        | Early-persistent |          |     |        |          |      | Late   |          |      |      |          |        |  |  |
|-----------------------------------------------------|-----------------|----------|-----|------|----------|--------|------------------|----------|-----|--------|----------|------|--------|----------|------|------|----------|--------|--|--|
| N=481                                               | n = 37          |          |     |      |          |        | n = 18           |          |     |        |          |      | n = 18 |          |      |      |          |        |  |  |
|                                                     | O               | 95% CI   |     |      | O        | 95% CI |                  |          | O   | 95% CI |          |      | O      | 95% CI   |      |      | O        | 95% CI |  |  |
| <i>Prenatal exposures</i>                           | R               |          |     |      | R*       |        |                  |          | R   |        |          |      | R      |          |      |      | R        |        |  |  |
| <b>Farm milk during pregnancy</b>                   | 0.87            | 0.4-1.0  | 1.7 | 0.89 | 0.37-0.7 | 2.15   | 1.4              | 0.4-0.6  | 2.9 | 1.2    | 0.3-0.5  | 4.77 | 0.73   | 0.28-0.8 | 1.89 | 1.05 | 0.20-0.9 | 3.27   |  |  |
| <b>Farm milk during pregnancy: unboiled</b>         | 0.71            | 0.35-0.4 | 1.4 | 0.59 | 0.25-0.5 | 1.40   | 1.32             | 0.51-0.9 | 3.3 | 1.08   | 0.3-0.8  | 3.49 | 0.66   | 0.24-0.6 | 1.79 | 0.91 | 0.29-0.7 | 3.09   |  |  |
| <b>Animal species, during pregnancy: continuous</b> | 0.93            | 0.68-0.7 | 1.2 | 0.99 | 0.67-0.7 | 1.44   | 0.97             | 0.64-0.9 | 1.4 | 1.06   | 0.5-0.6  | 2.71 | 0.57   | 0.32-0.2 | 1.01 | 0.55 | 0.27-0.7 | 1.13   |  |  |
| <b>Contact with pets (dogs or cats)</b>             | 1.10            | 0.54-0.3 | 2.1 | 1.33 | 0.50-0.0 | 2.51   | 1.19             | 0.44-0.4 | 3.2 | 1.12   | 0.32-0.2 | 4.02 | 0.75   | 0.29-0.9 | 1.93 | 0.81 | 0.27-0.7 | 2.40   |  |  |

| Allergic parents (at least one) | Early-transient |        |  |  |    |        | Early-persistent |  |   |        |  |  | Late   |        |  |  |   |        |  |  |
|---------------------------------|-----------------|--------|--|--|----|--------|------------------|--|---|--------|--|--|--------|--------|--|--|---|--------|--|--|
| N=551                           | n = 59          |        |  |  |    |        | n = 49           |  |   |        |  |  | n = 32 |        |  |  |   |        |  |  |
|                                 | O               | 95% CI |  |  | O  | 95% CI |                  |  | O | 95% CI |  |  | O      | 95% CI |  |  | O | 95% CI |  |  |
| <i>Prenatal exposures</i>       | R               |        |  |  | R* |        |                  |  | R |        |  |  | R      |        |  |  | R |        |  |  |
| <i>Prenatal exposures</i>       |                 |        |  |  |    |        |                  |  |   |        |  |  |        |        |  |  |   |        |  |  |

|                                          |      |      |      |      |      |      |      |      |      |      |      |      |      |      |      |      |      |      |
|------------------------------------------|------|------|------|------|------|------|------|------|------|------|------|------|------|------|------|------|------|------|
| <b>Farm milk during pregnancy</b>        | 0.69 | 0.37 | 1.29 | 0.72 | 0.34 | 1.55 | 1.52 | 0.83 | 2.78 | 1.45 | 0.67 | 3.12 | 1.39 | 0.67 | 2.90 | 1.79 | 0.68 | 4.72 |
| <b>Farm milk during pregnancy:</b>       |      |      |      |      |      |      |      |      |      |      |      |      |      |      |      |      |      |      |
| <b>unboiled</b>                          | 0.67 | 0.34 | 1.34 | 0.72 | 0.33 | 1.57 | 1.66 | 0.89 | 3.09 | 1.40 | 0.68 | 2.88 | 1.30 | 0.60 | 2.83 | 1.23 | 0.50 | 3.07 |
| <b>Animal species, during pregnancy:</b> |      |      |      |      |      |      |      |      |      |      |      |      |      |      |      |      |      |      |
| <b>continuous</b>                        | 0.76 | 0.56 | 1.03 | 0.71 | 0.49 | 1.05 | 0.97 | 0.71 | 1.28 | 0.75 | 0.48 | 1.17 | 1.08 | 0.77 | 1.52 | 1.20 | 0.78 | 1.87 |
| <b>Contact with pets (dogs or cats)</b>  | 0.65 | 0.37 | 1.12 | 0.62 | 0.33 | 1.16 | 0.74 | 0.40 | 1.43 | 0.21 | 0.33 | 0.61 | 1.05 | 0.51 | 2.07 | 0.70 | 0.29 | 1.67 |

\*adjusted for farmer, center, sex, parents with history of allergy

**eTable 6. Association between atopic dermatitis phenotypes and sensitization to food and inhalant allergens at 1 year of age (cut-off: 0.7 IU/ml)**

|                         | <b>Sensitization to food allergens at 1 year (37/915, 4.0%)</b>       |          |           |               |      |            |               |      |
|-------------------------|-----------------------------------------------------------------------|----------|-----------|---------------|------|------------|---------------|------|
|                         | <b>N</b>                                                              | <b>%</b> | <b>OR</b> | <b>95% CI</b> |      | <b>OR*</b> | <b>95% CI</b> |      |
| <b>Early-transient</b>  | 6/83                                                                  | 7.2      | 2.30      | 0.91-         | 5.79 | 2.24       | 0.87-         | 5.74 |
| <b>Early-persistent</b> | 6/59                                                                  | 10.2     | 3.34      | 1.31-         | 8.51 | 3.14       | 1.18-         | 8.34 |
| <b>Late</b>             | 1/42                                                                  | 2.4      | 0.72      | 0.10-         | 5.44 | 0.68       | 0.09-         | 5.18 |
| <b>Never/infrequent</b> | 24/731                                                                | 3.3      | 1         | -             |      | 1          | -             |      |
|                         | <b>Sensitization to inhalant allergens at 1 year (134/915, 14.6%)</b> |          |           |               |      |            |               |      |
|                         | <b>N</b>                                                              | <b>%</b> | <b>OR</b> | <b>95% CI</b> |      | <b>OR*</b> | <b>95% CI</b> |      |
| <b>Early-transient</b>  | 12/83                                                                 | 14.5     | 1.02      | 0.53-         | 1.94 | 0.92       | 0.47-         | 1.79 |
| <b>Early-persistent</b> | 10/59                                                                 | 17.0     | 1.23      | 0.60-         | 2.51 | 1.21       | 0.58-         | 2.53 |
| <b>Late</b>             | 8/42                                                                  | 19.1     | 1.42      | 0.64-         | 3.15 | 1.38       | 0.60-         | 3.17 |
| <b>Never/infrequent</b> | 104/731                                                               | 14.2     | 1         | -             |      | 1          | -             |      |

\*adjusted for farmer, center, sex, breastfeeding



**eFigure 1. Probability of atopic dermatitis symptoms at each time point from birth to 6 years of age for each atopic dermatitis phenotype in the 4-class model. With no missing data.**

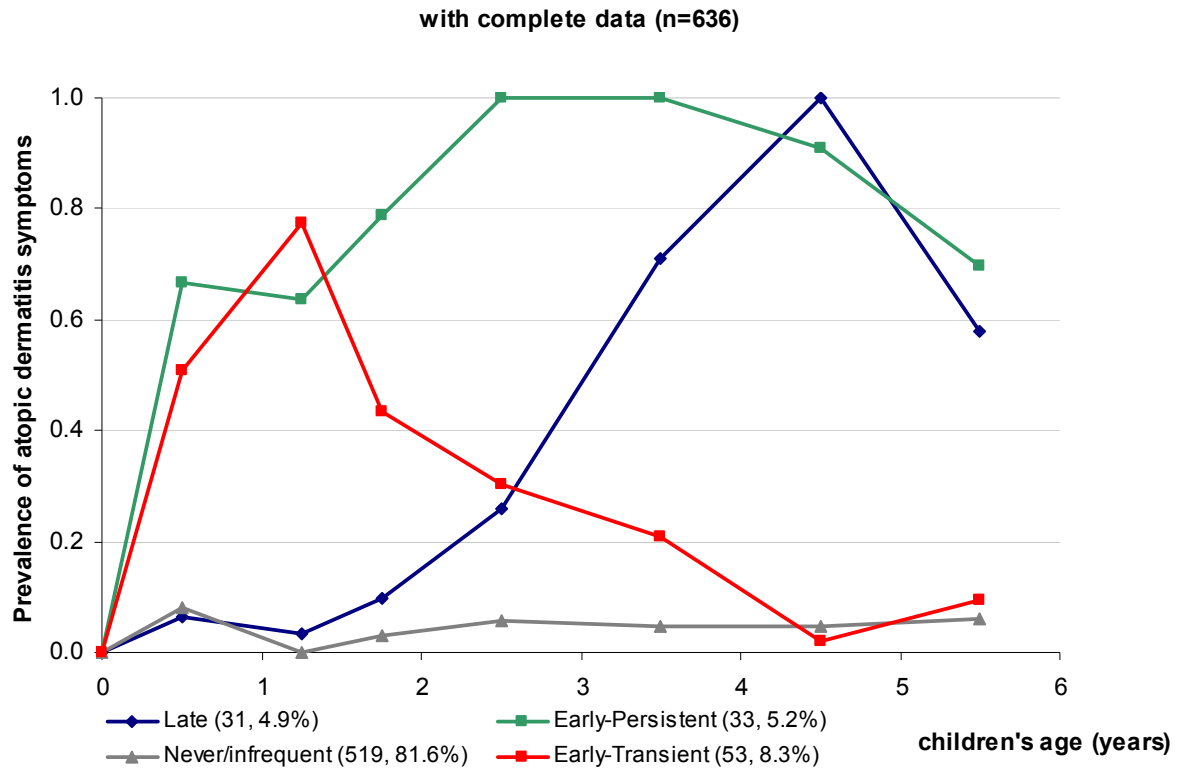

**eFigure 2. SCORAD scores at 1 and 6 years of age and atopic dermatitis phenotypes (only with children with SCORAD score>0)**

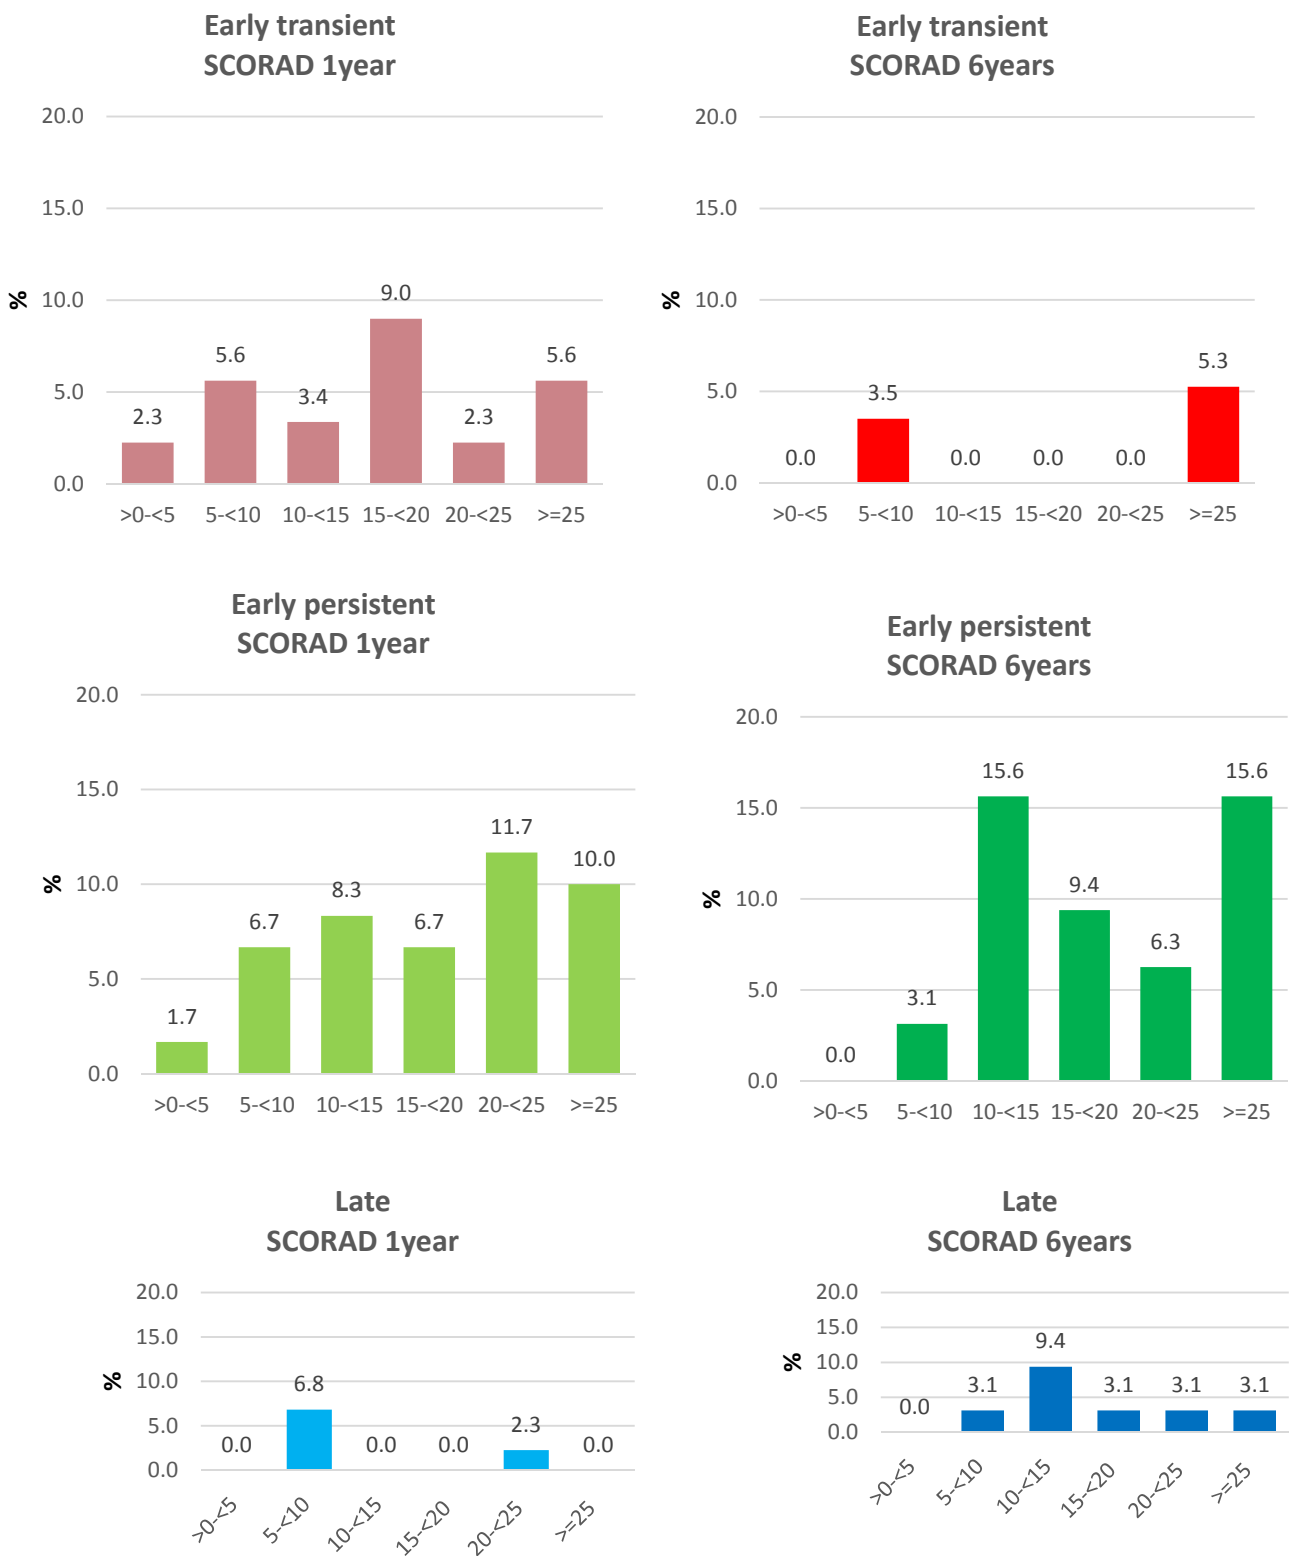

**eFigure 3. The prevalences of atopic dermatitis phenotypes stratified by the parental allergic status.**

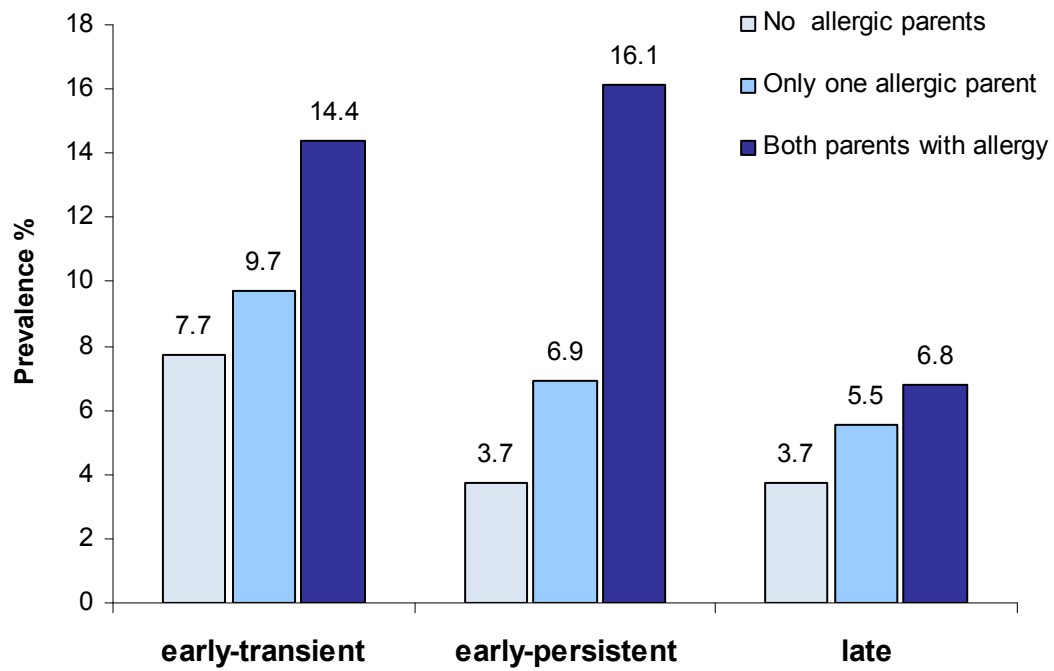

Supplement: jamapediatr-171-655-s001.pdf [file jamapediatr-171-655-s001.pdf]
